# Supplementary material
Source: PubMed Central journal article supplement (PMC7581298)
Supplement: ic0c02147_si_001.pdf [file ic0c02147_si_001.pdf]

# Intersystem Crossing and Triplet Dynamics in an Fe(II) N-Heterocyclic Carbene Photosensitizer

J. Patrick Zobel,<sup>\*,†</sup> Olga S. Bokareva,<sup>‡</sup> Christoph Wölper,<sup>¶</sup> Peter Zimmer,<sup>§</sup>  
Matthias Bauer,<sup>§</sup> and Leticia González<sup>\*,†,||</sup>

<sup>†</sup>*Institute of Theoretical Chemistry, Faculty of Chemistry, University of Vienna,  
Währingerstr. 19, 1090 Vienna, Austria*

<sup>‡</sup>*Institute of Physics, Rostock University, Albert Einstein Straße 23-24, 18059 Rostock,  
Germany*

<sup>¶</sup>*Department for X-Ray Diffraction, Inorganic Chemistry, University of Duisburg-Essen,  
Universitätsstraße 7, D-45117 Essen, Germany*

<sup>§</sup>*Faculty of Science, Chemistry Department and Center for Sustainable Systems Design  
(CSSD), Paderborn University, Warburger Str. 100, 33098 Paderborn, Germany*

<sup>||</sup>*Vienna Research Platform on Accelerating Photoreaction Discovery, University of Vienna,  
Währingerstr. 19, 1090 Vienna, Austria*

E-mail: patrick.zobel@univie.ac.at; leticia.gonzalez@univie.ac.at

## Supporting Information

This document contains experimental data (1H-NMR, IR, optical absorption spectrum, X-RAY), Cartesian coordinates of the FC geometry, density-of-states for the LC-BLYP/6-31G\* calculations in terms of spin-adiabatic states, the characterization of the excited states at the FC geometry, the list of normal modes used in the LVC model, and videos in gif format showing the charge flow during the dynamics. See the following Table of Contents.

# Contents

|                                                                                                                           |            |
|---------------------------------------------------------------------------------------------------------------------------|------------|
| <b>Supporting Information</b>                                                                                             | <b>S1</b>  |
| <b>S1 Experimental Data</b>                                                                                               | <b>S4</b>  |
| S1.1 Analytical Data . . . . .                                                                                            | S4         |
| S1.2 Optical Absorption Spectrum of $[\text{Fe}^{\text{II}}(\text{tpy})(\text{pyz}-\text{NHC})](\text{PF}_6)_2$ . . . . . | S6         |
| S1.3 Details of Single Crystal Structure Analysis . . . . .                                                               | S6         |
| <b>S2 Ground-State Equilibrium Geometry</b>                                                                               | <b>S20</b> |
| <b>S3 Density of States in the Wigner Ensemble</b>                                                                        | <b>S22</b> |
| <b>S4 Excited States at the FC Geometry</b>                                                                               | <b>S24</b> |
| <b>S5 Normal Modes in LVC Model</b>                                                                                       | <b>S26</b> |
| <b>S6 Charge Flow During the Dynamics</b>                                                                                 | <b>S30</b> |

## List of Tables

|    |                                                                    |     |
|----|--------------------------------------------------------------------|-----|
| S1 | Crystal Structure Data. . . . .                                    | S8  |
| S2 | Atomic coordinates and isotropic displacement parameters . . . . . | S10 |
| S3 | Ground-state geometry optimization . . . . .                       | S20 |
| S4 | State characterization at the FC geometry . . . . .                | S25 |
| S5 | Normal modes excluded in the LVC model. . . . .                    | S26 |

## List of Figures

|    |                                                                                                                                  |     |
|----|----------------------------------------------------------------------------------------------------------------------------------|-----|
| S1 | <sup>1</sup> H-NMR spectrum. . . . .                                                                                             | S4  |
| S2 | ESI mass spectrum. . . . .                                                                                                       | S5  |
| S3 | Experimental optical absorption spectrum of [Fe <sup>II</sup> (tpy)(pyz-NHC)](PF <sub>6</sub> ) <sub>2</sub> in<br>MeCN. . . . . | S6  |
| S4 | Crystal structure of [Fe <sup>II</sup> (tpy)(pyz-NHC)](PF <sub>6</sub> ) <sub>2</sub> . . . . .                                  | S7  |
| S5 | Singlet and triplet density of states . . . . .                                                                                  | S23 |

# S1 Experimental Data

## S1.1 Analytical Data

**<sup>1</sup>H NMR:** NMR spectra were recorded with a Bruker Avance 500 (1H, 500.1 MHz; <sup>13</sup>C, 125.8 MHz) in acetone-d<sub>6</sub>.

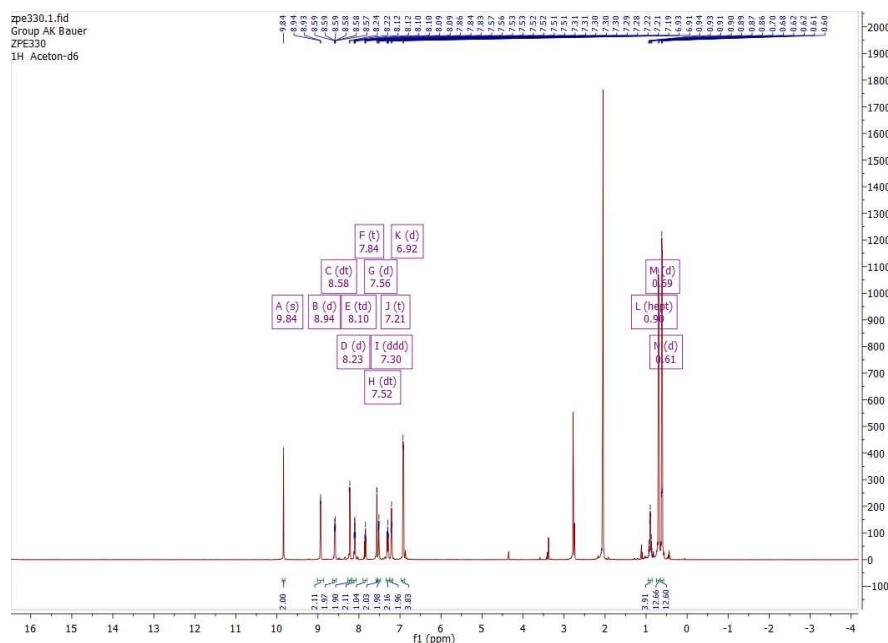

Figure S1: <sup>1</sup>H-NMR spectrum.

<sup>1</sup>H NMR (500 MHz, Acetone-d<sub>6</sub>)  $\delta$  9.84 (s, 2H), 8.94 (d,  $J = 2.1$  Hz, 2H), 8.58 (dt,  $J = 8.0$ , 1.1 Hz, 2H), 8.23 (d,  $J = 8.0$  Hz, 2H), 8.10 (td,  $J = 7.7$ , 1.4 Hz, 2H), 7.84 (t,  $J = 8.0$  Hz, 1H), 7.56 (d,  $J = 2.2$  Hz, 2H), 7.52 (dt,  $J = 5.7$ , 1.0 Hz, 2H), 7.30 (ddd,  $J = 7.3$ , 5.7, 1.4 Hz, 2H), 7.21 (t,  $J = 7.8$  Hz, 2H), 6.92 (d,  $J = 7.9$  Hz, 4H), 0.90 (hept,  $J = 6.6$  Hz, 4H), 0.69 (d,  $J = 6.6$  Hz, 12H), 0.61 (d,  $J = 6.6$  Hz, 12H).

**Mass spectrometry:** ESI-Mass spectra were recorded by a Waters Synapt 2G (QTOF). HRMS (ESI)  $m/z$  410.681 0.5 [ $M - 2PF_6$ ]<sup>2+</sup> (calcd for C<sub>49</sub>H<sub>51</sub>FeN<sub>9</sub> 821.3617).

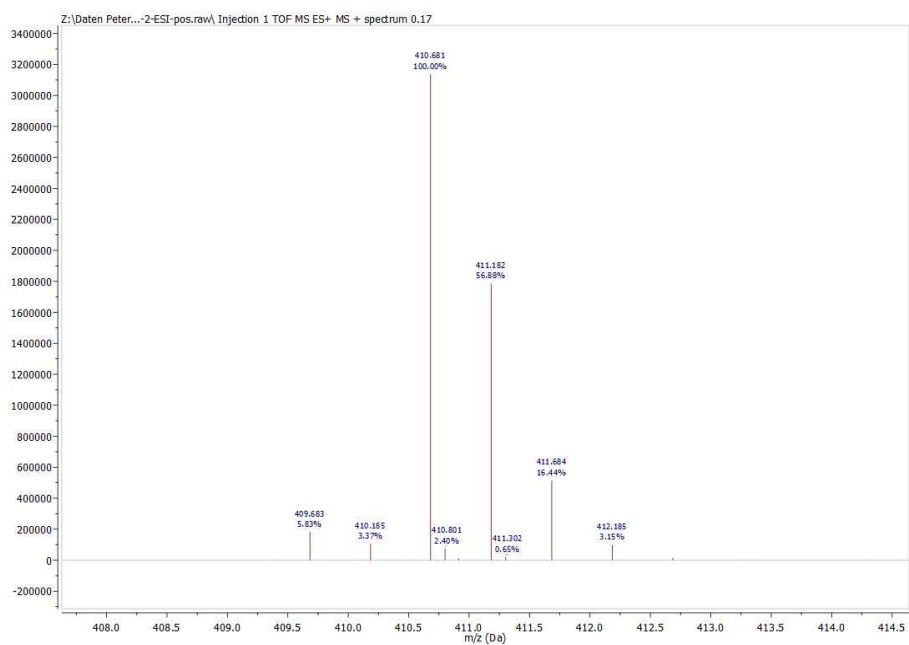

Figure S2: ESI mass spectrum.

## S1.2 Optical Absorption Spectrum of [Fe<sup>II</sup>(tpy)(pyz-NHC)](PF<sub>6</sub>)<sub>2</sub>

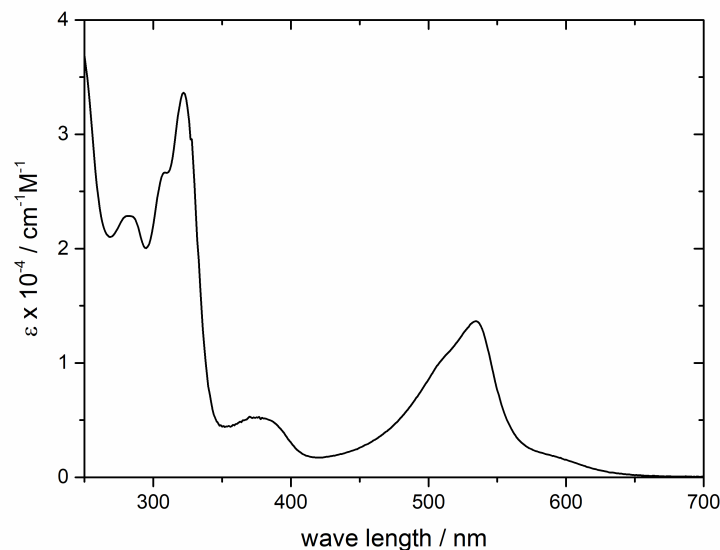

Figure S3: Experimental optical absorption spectrum of [Fe<sup>II</sup>(tpy)(pyz-NHC)](PF<sub>6</sub>)<sub>2</sub> in MeCN.

## S1.3 Details of Single Crystal Structure Analysis

**Crystal structure data of compound [Fe<sup>II</sup>(tpy)(pyz-NHC)](PF<sub>6</sub>)<sub>2</sub>:** [C<sub>51</sub> H<sub>57</sub> F<sub>12</sub> Fe N<sub>9</sub> O P<sub>2</sub>],  $M = 1157.84$ , dark red crystal, (0.186 × 0.067 × 0.042 mm); monoclinic, space group P 21/c;  $a = 13.1873(9)$  Å,  $b = 20.1999(13)$  Å,  $c = 39.201(3)$  Å;  $\alpha = 90^\circ$ ,  $\beta = 97.484(4)^\circ$ ,  $\gamma = 90^\circ$ ,  $V = 10353.5(12)$  Å<sup>3</sup>;  $Z = 8$ ;  $\mu = 0.445$  mm<sup>-1</sup>;  $\rho_{\text{calc}} = 1.486$  g·cm<sup>-3</sup>; 140304 reflections ( $\vartheta_{\text{max}} = 30.561^\circ$ ), 30242 unique ( $R_{\text{int}} = 0.0833$ ); 1343 parameters; largest max./min in the final difference Fourier synthesis 3.419 e·Å<sup>-3</sup>/ -1.226 e·Å<sup>-3</sup>; max./min. transmission 0.75/0.67;  $R_1 = 0.0656$  ( $I > 2\sigma(I)$ ),  $wR_2 = 0.1868$  (all data).

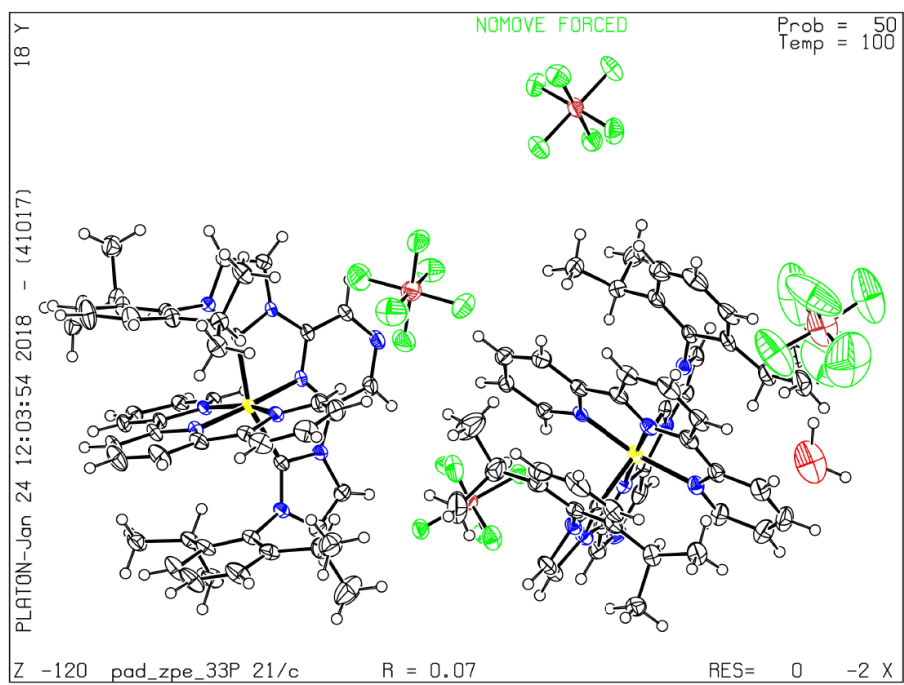

Figure S4: Crystal structure of  $[\text{Fe}^{\text{II}}(\text{tpy})(\text{pyz-NHC})](\text{PF}_6)_2$ .

Table S1: Crystal Structure Data.

---

|                                      |                                                                                  |
|--------------------------------------|----------------------------------------------------------------------------------|
| Identification code                  | pad_zpe_330m_sq                                                                  |
| Empirical formula                    | C <sub>51</sub> H <sub>57</sub> F <sub>12</sub> FeN <sub>9</sub> OP <sub>2</sub> |
| Formula weight                       | 1157.84                                                                          |
| Density (calculated)                 | 1.486 g·cm <sup>-3</sup>                                                         |
| F(000)                               | 4784                                                                             |
| Temperature                          | 100(2) K                                                                         |
| Crystal size                         | 0.186 × 0.067 × 0.042 mm                                                         |
| Crystal colour                       | dark red                                                                         |
| Crystal description                  | prism                                                                            |
| Wavelength                           | 0.71073 Å                                                                        |
| Crystal system                       | monoclinic                                                                       |
| Space group                          | <i>P</i> 21/ <i>c</i>                                                            |
| Unit cell dimensions                 |                                                                                  |
| a [Å]                                | 13.1873(9)                                                                       |
| b [Å]                                | 20.1999(13)                                                                      |
| c [Å]                                | 39.201(3)                                                                        |
| α [°]                                | 90                                                                               |
| β [°]                                | 97.484(4)                                                                        |
| γ [°]                                | 90                                                                               |
| Volume                               | 10353.5(12) Å <sup>3</sup>                                                       |
| Z                                    | 8                                                                                |
| Cell measurement reflections used    | 9987                                                                             |
| Cell measurement $\vartheta$ min/max | 2.23°/25.71°                                                                     |
| Diffractometer control software      | BRUKER D8 KAPPA APEX 2 (3.0-2009)                                                |
| Diffractometer measurement device    | Bruker D8 KAPPA series II with<br>APEX II area detector system                   |



|                                                   |                                                                                                                        |
|---------------------------------------------------|------------------------------------------------------------------------------------------------------------------------|
| Diffraction measurement method                    | Data collection strategy APEX 2/COSMO                                                                                  |
| $\vartheta$ range for data collection             | 1.855°- 30.561°                                                                                                        |
| Completeness to $\vartheta = 25.242^\circ$        | 99.3 %                                                                                                                 |
| Completeness to $\vartheta_{\max} = 30.561^\circ$ | 95.2 %                                                                                                                 |
| Index ranges                                      | $-18 \leq h \leq 18$<br>$-28 \leq k \leq 28$<br>$-55 \leq l \leq 55$                                                   |
| Computing data reduction                          | BRUKER D8 KAPPA APEX 2 (3.0-2009)                                                                                      |
| Absorption coefficient                            | 0.445 mm <sup>-1</sup>                                                                                                 |
| Absorption correction                             | Semi-empirical from equivalents                                                                                        |
| Computation absorption correction                 | BRUKER AXS SMART APEX 2 Vers. 3.0-2009                                                                                 |
| Max./min. Transmission                            | 0.75/0.67                                                                                                              |
| $R_{\text{merg}}$ before/after correction         | 0.0600/0.0529                                                                                                          |
| Computing structure solution                      | BRUKER D8 KAPPA APEX 2 (3.0-2009)                                                                                      |
| Computing structure refinement                    | SHELXL-2017/1 (Sheldrick, 2017)                                                                                        |
| Refinement method                                 | Full-matrix least-squares on $F^2$                                                                                     |
| Reflections collected                             | 140304                                                                                                                 |
| Independent reflections                           | 30242                                                                                                                  |
| $R_{\text{int}}$                                  | 0.0833                                                                                                                 |
| Reflections with $I > 2\sigma(I)$                 | 14958                                                                                                                  |
| Restraints                                        | 1                                                                                                                      |
| Parameter                                         | 1343                                                                                                                   |
| GooF                                              | 0.999                                                                                                                  |
| Weighting details                                 | $w = 1/[\sigma^2(F_{\text{obs}}^2) + (0.0736P)^2 + 13.5191P]$<br>where $P = (F_{\text{obs}}^2 + 2F_{\text{calc}}^2)/3$ |
| $R_1 [I > 2\sigma(I)]$                            | 0.0656                                                                                                                 |
| $wR_2 [I > 2\sigma(I)]$                           | 0.1461                                                                                                                 |

|                              |              |
|------------------------------|--------------|
| $R_1$ [all data]             | 0.1627       |
| $wR_2$ [all data]            | 0.1868       |
| Absolute structure parameter |              |
| Largest diff. peak and hole  | 3.419/-1.226 |

---

Table S2: Atomic coordinates ( $\times 10^4$ ) and equivalent isotropic displacement parameters ( $\text{\AA}^2 \times 10^3$ ) for pad\_zpe\_330m\_sq.  $U_{eq}$  is defined as one third of the trace of the orthogonalized  $U_{ij}$  tensor.

|      | <b>x</b> | <b>y</b> | <b>z</b> | <b><math>U_{eq}</math></b> |
|------|----------|----------|----------|----------------------------|
| O(1) | 70(4)    | 1139(2)  | 5195(1)  | 95(2)                      |
| H(2) | -634     | 814      | 5190     | 100(20)                    |
| H(1) | 804      | 829      | 5195     | 67(16)                     |
| Fe11 | 5083(1)  | 7505(1)  | 3320(1)  | 17(1)                      |
| N11  | 4973(2)  | 8035(1)  | 2894(1)  | 19(1)                      |
| N21  | 5475(2)  | 8338(1)  | 3510(1)  | 22(1)                      |
| N31  | 5263(2)  | 7265(1)  | 3811(1)  | 21(1)                      |
| N41  | 4736(2)  | 6664(1)  | 3114(1)  | 18(1)                      |
| N51  | 4243(2)  | 5436(1)  | 2827(1)  | 27(1)                      |
| N61  | 6420(2)  | 6544(1)  | 3101(1)  | 18(1)                      |
| N71  | 7489(2)  | 7296(1)  | 3286(1)  | 19(1)                      |
| N81  | 3117(2)  | 6946(1)  | 3150(1)  | 21(1)                      |
| N91  | 2771(2)  | 7840(1)  | 3407(1)  | 22(1)                      |
| C11  | 4597(2)  | 7840(2)  | 2575(1)  | 21(1)                      |
| H11  | 4369     | 7396     | 2541     | 25                         |
| C21  | 4528(3)  | 8257(2)  | 2294(1)  | 23(1)                      |
| H21  | 4234     | 8108     | 2073     | 28                         |
| C31  | 4897(3)  | 8901(2)  | 2340(1)  | 27(1)                      |
| H31  | 4888     | 9191     | 2149     | 33                         |

|      |         |         |         |       |
|------|---------|---------|---------|-------|
| C41  | 5277(3) | 9112(2) | 2666(1) | 25(1) |
| H41  | 5523    | 9552    | 2702    | 31    |
| C51  | 5295(2) | 8674(2) | 2940(1) | 21(1) |
| C61  | 5604(3) | 8846(2) | 3300(1) | 24(1) |
| C71  | 5979(3) | 9452(2) | 3432(1) | 33(1) |
| H71  | 6091    | 9808    | 3283    | 40    |
| C81  | 6185(3) | 9521(2) | 3787(1) | 42(1) |
| H81  | 6436    | 9931    | 3883    | 50    |
| C91  | 6027(3) | 8998(2) | 4001(1) | 37(1) |
| H91  | 6159    | 9046    | 4244    | 44    |
| C101 | 5673(3) | 8402(2) | 3855(1) | 26(1) |
| C111 | 5513(3) | 7780(2) | 4033(1) | 26(1) |
| C121 | 5641(3) | 7696(2) | 4386(1) | 36(1) |
| H121 | 5790    | 8065    | 4534    | 43    |
| C131 | 5548(3) | 7067(2) | 4521(1) | 41(1) |
| H131 | 5642    | 6998    | 4763    | 49    |
| C141 | 5317(3) | 6544(2) | 4299(1) | 36(1) |
| H141 | 5256    | 6108    | 4385    | 44    |
| C151 | 5174(3) | 6662(2) | 3948(1) | 28(1) |
| H151 | 5006    | 6299    | 3797    | 33    |
| C161 | 3765(2) | 6463(2) | 3046(1) | 20(1) |
| C171 | 3516(3) | 5851(2) | 2902(1) | 26(1) |
| H171 | 2819    | 5723    | 2856    | 32    |
| C181 | 5211(3) | 5641(2) | 2886(1) | 24(1) |
| H181 | 5741    | 5360    | 2830    | 29    |
| C191 | 5455(3) | 6257(2) | 3029(1) | 20(1) |
| C201 | 3573(3) | 7502(2) | 3312(1) | 20(1) |

|       |         |         |         |       |
|-------|---------|---------|---------|-------|
| C211  | 2059(3) | 6954(2) | 3140(1) | 28(1) |
| H211  | 1586    | 6631    | 3042    | 34    |
| C221  | 1850(3) | 7513(2) | 3297(1) | 28(1) |
| H221  | 1188    | 7664    | 3330    | 34    |
| C231  | 2884(3) | 8418(2) | 3628(1) | 24(1) |
| C241  | 2870(3) | 8320(2) | 3985(1) | 29(1) |
| C251  | 3094(3) | 8870(2) | 4195(1) | 40(1) |
| H251  | 3100    | 8827    | 4436    | 48    |
| C261  | 3304(4) | 9474(2) | 4060(1) | 44(1) |
| H261  | 3495    | 9835    | 4210    | 53    |
| C271  | 3241(4) | 9563(2) | 3708(1) | 42(1) |
| H271  | 3358    | 9990    | 3619    | 51    |
| C281  | 3008(3) | 9036(2) | 3482(1) | 28(1) |
| C291  | 2559(3) | 7669(2) | 4136(1) | 36(1) |
| H291  | 2778    | 7298    | 3993    | 43    |
| C301  | 1398(4) | 7637(3) | 4127(1) | 65(2) |
| H30A1 | 1204    | 7201    | 4207    | 97    |
| H30B1 | 1069    | 7710    | 3891    | 97    |
| H30C1 | 1177    | 7981    | 4278    | 97    |
| C311  | 3014(4) | 7556(2) | 4510(1) | 48(1) |
| H31A1 | 2710    | 7869    | 4658    | 72    |
| H31B1 | 3756    | 7624    | 4533    | 72    |
| H31C1 | 2869    | 7102    | 4577    | 72    |
| C321  | 2808(3) | 9150(2) | 3095(1) | 28(1) |
| H321  | 3132    | 8780    | 2978    | 33    |
| C331  | 1648(3) | 9133(2) | 2976(1) | 34(1) |
| H33A1 | 1374    | 8700    | 3030    | 51    |

|       |         |         |         |       |
|-------|---------|---------|---------|-------|
| H33B1 | 1520    | 9209    | 2727    | 51    |
| H33C1 | 1311    | 9480    | 3095    | 51    |
| C341  | 3230(3) | 9803(2) | 2978(1) | 34(1) |
| H34A1 | 2858    | 10172   | 3066    | 51    |
| H34B1 | 3145    | 9818    | 2726    | 51    |
| H34C1 | 3958    | 9837    | 3066    | 51    |
| C351  | 6469(2) | 7167(2) | 3252(1) | 19(1) |
| C361  | 7362(3) | 6304(2) | 3043(1) | 22(1) |
| H361  | 7507    | 5892    | 2943    | 27    |
| C371  | 8023(3) | 6776(2) | 3157(1) | 23(1) |
| H371  | 8741    | 6761    | 3152    | 27    |
| C381  | 8031(2) | 7870(2) | 3439(1) | 21(1) |
| C391  | 8326(3) | 7869(2) | 3797(1) | 25(1) |
| C401  | 8934(3) | 8392(2) | 3932(1) | 36(1) |
| H401  | 9134    | 8415    | 4173    | 43    |
| C411  | 9256(3) | 8876(2) | 3724(1) | 44(1) |
| H411  | 9688    | 9222    | 3822    | 52    |
| C421  | 8953(3) | 8863(2) | 3375(1) | 38(1) |
| H421  | 9170    | 9206    | 3236    | 45    |
| C431  | 8334(3) | 8357(2) | 3220(1) | 26(1) |
| C441  | 8029(3) | 7329(2) | 4032(1) | 27(1) |
| H441  | 7304    | 7203    | 3950    | 32    |
| C451  | 8077(3) | 7553(2) | 4407(1) | 34(1) |
| H45A1 | 7753    | 7218    | 4538    | 51    |
| H45B1 | 7717    | 7975    | 4417    | 51    |
| H45C1 | 8793    | 7607    | 4507    | 51    |
| C461  | 8690(3) | 6705(2) | 4016(1) | 36(1) |

|       |          |         |         |       |
|-------|----------|---------|---------|-------|
| H46A1 | 9397     | 6804    | 4112    | 53    |
| H46B1 | 8672     | 6565    | 3776    | 53    |
| H46C1 | 8423     | 6350    | 4149    | 53    |
| C471  | 8038(3)  | 8353(2) | 2834(1) | 27(1) |
| H471  | 7399     | 8086    | 2781    | 33    |
| C481  | 7828(3)  | 9049(2) | 2689(1) | 34(1) |
| H48A1 | 7419     | 9296    | 2838    | 52    |
| H48B1 | 7452     | 9019    | 2457    | 52    |
| H48C1 | 8478     | 9280    | 2679    | 52    |
| C491  | 8874(3)  | 8031(2) | 2652(1) | 39(1) |
| H49A1 | 9512     | 8281    | 2704    | 58    |
| H49B1 | 8662     | 8032    | 2403    | 58    |
| H49C1 | 8982     | 7574    | 2732    | 58    |
| Fe12  | 256(1)   | 3126(1) | 3733(1) | 20(1) |
| N12   | -743(2)  | 2615(1) | 3960(1) | 26(1) |
| N22   | 1140(2)  | 2796(1) | 4105(1) | 22(1) |
| N32   | 1529(2)  | 3518(1) | 3623(1) | 20(1) |
| N42   | -714(2)  | 3448(1) | 3368(1) | 22(1) |
| N52   | -2262(2) | 3854(2) | 2872(1) | 29(1) |
| N62   | -804(2)  | 4334(1) | 3704(1) | 24(1) |
| N72   | 168(2)   | 4428(1) | 4182(1) | 24(1) |
| N82   | -391(2)  | 2511(1) | 3095(1) | 23(1) |
| N92   | 845(2)   | 1889(1) | 3302(1) | 22(1) |
| C12   | -1738(3) | 2519(2) | 3850(1) | 33(1) |
| H12   | -2033    | 2741    | 3648    | 39    |
| C22   | -2350(3) | 2111(2) | 4017(1) | 42(1) |
| H22   | -3050    | 2054    | 3929    | 50    |

|      |          |         |         |       |
|------|----------|---------|---------|-------|
| C32  | -1942(3) | 1789(2) | 4312(1) | 42(1) |
| H32  | -2353    | 1503    | 4428    | 50    |
| C42  | -925(3)  | 1889(2) | 4436(1) | 36(1) |
| H42  | -631     | 1682    | 4643    | 43    |
| C52  | -337(3)  | 2296(2) | 4253(1) | 28(1) |
| C62  | 750(3)   | 2411(2) | 4343(1) | 28(1) |
| C72  | 1396(3)  | 2170(2) | 4626(1) | 32(1) |
| H72  | 1133     | 1904    | 4794    | 39    |
| C82  | 2416(3)  | 2324(2) | 4658(1) | 36(1) |
| H82  | 2862     | 2160    | 4849    | 43    |
| C92  | 2812(3)  | 2717(2) | 4415(1) | 32(1) |
| H92  | 3519     | 2824    | 4439    | 38    |
| C102 | 2141(3)  | 2949(2) | 4136(1) | 24(1) |
| C112 | 2370(3)  | 3372(2) | 3854(1) | 23(1) |
| C122 | 3313(3)  | 3626(2) | 3812(1) | 30(1) |
| H122 | 3894     | 3516    | 3972    | 36    |
| C132 | 3421(3)  | 4042(2) | 3539(1) | 32(1) |
| H132 | 4070     | 4220    | 3509    | 38    |
| C142 | 2561(3)  | 4193(2) | 3309(1) | 27(1) |
| H142 | 2609     | 4483    | 3121    | 32    |
| C152 | 1640(3)  | 3918(2) | 3358(1) | 23(1) |
| H152 | 1056     | 4016    | 3197    | 28    |
| C162 | -1206(3) | 4020(2) | 3400(1) | 24(1) |
| C172 | -1980(3) | 4223(2) | 3150(1) | 28(1) |
| H172 | -2316    | 4632    | 3178    | 34    |
| C182 | -1777(3) | 3285(2) | 2838(1) | 27(1) |
| H182 | -1969    | 3017    | 2641    | 33    |

|       |         |         |         |       |
|-------|---------|---------|---------|-------|
| C192  | -995(3) | 3078(2) | 3086(1) | 23(1) |
| C202  | -92(3)  | 3989(2) | 3923(1) | 22(1) |
| C212  | -978(3) | 4965(2) | 3829(1) | 31(1) |
| H212  | -1434   | 5290    | 3722    | 37    |
| C222  | -381(3) | 5019(2) | 4126(1) | 30(1) |
| H222  | -334    | 5392    | 4275    | 36    |
| C232  | 878(3)  | 4316(2) | 4493(1) | 24(1) |
| C242  | 1861(3) | 4592(2) | 4519(1) | 34(1) |
| C252  | 2488(3) | 4498(2) | 4831(1) | 41(1) |
| H252  | 3159    | 4679    | 4859    | 49    |
| C262  | 2163(3) | 4152(2) | 5096(1) | 45(1) |
| H262  | 2609    | 4094    | 5304    | 55    |
| C272  | 1195(3) | 3888(2) | 5063(1) | 35(1) |
| H272  | 982     | 3648    | 5250    | 42    |
| C282  | 516(3)  | 3965(2) | 4761(1) | 26(1) |
| C292  | 2231(3) | 4992(2) | 4234(1) | 47(1) |
| H292  | 1943    | 4797    | 4007    | 56    |
| C302  | 3408(4) | 5000(3) | 4260(2) | 84(2) |
| H30A2 | 3612    | 5173    | 4045    | 125   |
| H30B2 | 3672    | 4549    | 4299    | 125   |
| H30C2 | 3688    | 5285    | 4452    | 125   |
| C312  | 1934(5) | 5725(2) | 4240(2) | 66(2) |
| H31A2 | 2252    | 5964    | 4064    | 100   |
| H31B2 | 2171    | 5911    | 4467    | 100   |
| H31C2 | 1189    | 5767    | 4192    | 100   |
| C322  | -566(3) | 3698(2) | 4738(1) | 29(1) |
| H322  | -750    | 3509    | 4502    | 35    |



|       |          |         |         |       |
|-------|----------|---------|---------|-------|
| C332  | -697(3)  | 3152(2) | 4996(1) | 38(1) |
| H33A2 | -1375    | 2951    | 4941    | 57    |
| H33B2 | -631     | 3340    | 5229    | 57    |
| H33C2 | -170     | 2814    | 4985    | 57    |
| C342  | -1328(3) | 4255(2) | 4783(1) | 36(1) |
| H34A2 | -1326    | 4576    | 4595    | 54    |
| H34B2 | -1130    | 4477    | 5004    | 54    |
| H34C2 | -2016    | 4068    | 4778    | 54    |
| C352  | 321(2)   | 2428(2) | 3382(1) | 21(1) |
| C362  | -314(3)  | 2031(2) | 2847(1) | 28(1) |
| H362  | -726     | 1988    | 2631    | 33    |
| C372  | 459(3)   | 1643(2) | 2976(1) | 26(1) |
| H372  | 706      | 1267    | 2866    | 32    |
| C382  | 1713(3)  | 1608(2) | 3524(1) | 24(1) |
| C392  | 2694(3)  | 1764(2) | 3454(1) | 29(1) |
| C402  | 3507(3)  | 1539(2) | 3688(1) | 38(1) |
| H402  | 4190     | 1623    | 3648    | 45    |
| C412  | 3326(3)  | 1193(2) | 3978(1) | 42(1) |
| H412  | 3884     | 1069    | 4144    | 50    |
| C422  | 2343(3)  | 1026(2) | 4029(1) | 36(1) |
| H422  | 2238     | 780     | 4228    | 44    |
| C432  | 1506(3)  | 1208(2) | 3799(1) | 29(1) |
| C442  | 2897(3)  | 2146(2) | 3137(1) | 36(1) |
| H442  | 2321     | 2464    | 3077    | 43    |
| C452  | 3888(4)  | 2540(2) | 3188(1) | 54(1) |
| H45A2 | 4468     | 2240    | 3181    | 81    |
| H45B2 | 3953     | 2764    | 3412    | 81    |

|       |         |         |         |        |
|-------|---------|---------|---------|--------|
| H45C2 | 3881    | 2870    | 3005    | 81     |
| C462  | 2944(3) | 1692(2) | 2829(1) | 42(1)  |
| H46A2 | 3024    | 1959    | 2625    | 63     |
| H46B2 | 2311    | 1434    | 2786    | 63     |
| H46C2 | 3528    | 1391    | 2877    | 63     |
| C472  | 436(3)  | 963(2)  | 3830(1) | 35(1)  |
| H472  | -38     | 1351    | 3805    | 42     |
| C482  | 82(3)   | 468(2)  | 3539(1) | 40(1)  |
| H48A2 | 102     | 681     | 3316    | 60     |
| H48B2 | -618    | 324     | 3558    | 60     |
| H48C2 | 538     | 82      | 3559    | 60     |
| C492  | 339(4)  | 622(2)  | 4174(1) | 49(1)  |
| H49A2 | -382    | 523     | 4188    | 73     |
| H49B2 | 604     | 915     | 4364    | 73     |
| H49C2 | 733     | 209     | 4189    | 73     |
| P13   | 2521(2) | 43(1)   | 5138(1) | 85(1)  |
| F13   | 2634(4) | 818(2)  | 5199(1) | 127(2) |
| F23   | 3025(7) | 128(3)  | 4815(1) | 192(3) |
| F33   | 1480(6) | 119(4)  | 4920(2) | 255(4) |
| F43   | 3539(5) | -52(2)  | 5366(1) | 167(3) |
| F53   | 2008(7) | -16(4)  | 5460(2) | 209(3) |
| F63   | 2501(5) | -738(2) | 5064(1) | 146(2) |
| P14   | 6838(1) | 1401(1) | 3057(1) | 29(1)  |
| F14   | 7007(2) | 673(1)  | 2922(1) | 46(1)  |
| F24   | 6370(2) | 1112(1) | 3380(1) | 47(1)  |
| F34   | 5719(2) | 1414(1) | 2837(1) | 40(1)  |
| F44   | 7951(2) | 1409(1) | 3270(1) | 44(1)  |

|     |          |         |         |       |
|-----|----------|---------|---------|-------|
| F54 | 7294(2)  | 1708(1) | 2727(1) | 38(1) |
| F64 | 6654(2)  | 2140(1) | 3188(1) | 40(1) |
| P15 | 6143(1)  | 4750(1) | 3815(1) | 37(1) |
| F15 | 6731(2)  | 5275(1) | 3608(1) | 58(1) |
| F25 | 5125(2)  | 5179(1) | 3720(1) | 49(1) |
| F35 | 5859(2)  | 4344(1) | 3467(1) | 50(1) |
| F45 | 6423(2)  | 5164(2) | 4157(1) | 67(1) |
| F55 | 7157(2)  | 4321(1) | 3905(1) | 47(1) |
| F65 | 5523(2)  | 4229(1) | 4013(1) | 50(1) |
| P16 | -21(1)   | 5426(1) | 2810(1) | 23(1) |
| F16 | 455(2)   | 5426(1) | 2460(1) | 52(1) |
| F26 | -1136(2) | 5458(1) | 2598(1) | 39(1) |
| F36 | -56(2)   | 4633(1) | 2804(1) | 29(1) |
| F46 | 8(2)     | 6227(1) | 2817(1) | 32(1) |
| F56 | 1093(2)  | 5407(1) | 3022(1) | 51(1) |
| F66 | -513(2)  | 5436(1) | 3160(1) | 40(1) |

---

## S2 Ground-State Equilibrium Geometry

The ground-state equilibrium geometry of the polypyridyl NHC iron (II) complex as shown in Figure 1 in the main paper was optimized at the LC-BYLP/6-31G\* level of theory as described in the Computational Details. The Cartesian coordinates of the resulting geometry are reported in Table S3.

Table S3: Cartesian coordinates of the optimized geometry of the the polypyridyl NHC iron (II) complex given in Å.

| Atom | x         | y         | z         | Atom | x         | y        | z         |
|------|-----------|-----------|-----------|------|-----------|----------|-----------|
| Fe   | -0.035763 | -0.041454 | -0.040577 | C    | -7.417329 | 6.747134 | 3.536045  |
| N    | 2.431239  | 0.405669  | 2.629489  | C    | -4.325935 | 6.832579 | 6.908531  |
| N    | 0.039456  | 3.463679  | 0.010007  | C    | -6.195464 | 8.033446 | 5.489044  |
| N    | -2.482305 | 0.591087  | -2.688458 | H    | -8.888170 | 7.708529 | 2.453456  |
| C    | 1.582753  | 4.676942  | 1.669674  | H    | -3.395140 | 7.854753 | 8.442022  |
| C    | -1.444886 | 4.791915  | -1.615226 | H    | -6.729803 | 9.980861 | 5.930392  |
| C    | 1.676989  | 7.312708  | 1.750083  | C    | 4.934932  | 3.014680 | -4.420300 |
| C    | -1.413996 | 7.430572  | -1.626985 | C    | 3.727235  | 4.328115 | -6.402117 |
| C    | 0.163824  | 8.692930  | 0.078087  | C    | 6.868954  | 4.087362 | -2.926646 |
| H    | 2.915877  | 8.271169  | 3.094480  | C    | 4.480381  | 6.833651 | -6.835774 |
| H    | -2.604381 | 8.481573  | -2.945760 | C    | 7.542354  | 6.600092 | -3.443275 |
| H    | 0.215280  | 10.755044 | 0.104029  | C    | 6.369625  | 7.956187 | -5.379050 |
| C    | -2.939860 | 3.096695  | -3.199973 | H    | 3.588486  | 7.910924 | -8.354475 |
| C    | -4.673463 | 3.848603  | -5.045152 | H    | 9.028199  | 7.501640 | -2.330117 |
| C    | -3.755162 | -1.172542 | -4.031431 | H    | 6.956170  | 9.897802 | -5.777603 |
| C    | -5.979093 | 2.012076  | -6.412680 | C    | -8.296948 | 2.796477 | 0.952742  |
| H    | -5.001047 | 5.856502  | -5.398994 | H    | -7.009347 | 1.434809 | 0.022221  |
| C    | -5.505718 | -0.536501 | -5.892396 | C    | -9.405664 | 4.545361 | -1.074146 |

|   |           |           |           |   |            |           |           |
|---|-----------|-----------|-----------|---|------------|-----------|-----------|
| H | -3.342706 | -3.143625 | -3.579059 | H | -7.982587  | 5.830337  | -1.886018 |
| H | -7.346920 | 2.565368  | -7.854856 | H | -10.209837 | 3.399025  | -2.617264 |
| H | -6.479624 | -2.040840 | -6.911599 | H | -10.947152 | 5.706982  | -0.280960 |
| C | 2.996639  | 2.874064  | 3.209112  | C | -10.499033 | 1.300370  | 2.143808  |
| C | 4.755670  | 3.499682  | 5.076686  | H | -11.610925 | 0.368010  | 0.646848  |
| C | 3.620450  | -1.447391 | 3.928018  | H | -9.849617  | -0.165182 | 3.466780  |
| C | 5.976181  | 1.571904  | 6.396376  | H | -11.758361 | 2.604419  | 3.175067  |
| H | 5.168877  | 5.481100  | 5.484177  | C | -1.720451  | 2.983539  | 8.095216  |
| C | 5.392552  | -0.938818 | 5.808211  | H | -0.732125  | 1.539742  | 6.948423  |
| H | 3.120819  | -3.385619 | 3.424570  | C | -3.036474  | 1.635218  | 10.319500 |
| H | 7.363389  | 2.026788  | 7.854424  | H | -1.612225  | 0.746881  | 11.555032 |
| H | 6.297378  | -2.510251 | 6.789680  | H | -4.107494  | 3.021799  | 11.451095 |
| H | 2.674618  | -8.650728 | -2.874465 | H | -4.352382  | 0.155004  | 9.686865  |
| C | -1.715480 | -7.559029 | 1.405337  | C | 0.256192   | 4.804116  | 9.178596  |
| C | -1.680382 | -4.923665 | 1.423071  | H | 1.100115   | 6.017279  | 7.709945  |
| C | 1.453089  | -4.941097 | -1.610922 | H | -0.595591  | 6.044933  | 10.623507 |
| C | 1.417662  | -7.576471 | -1.636178 | H | 1.780942   | 3.717835  | 10.094564 |
| N | -0.166820 | -8.865771 | -0.126435 | C | 8.296250   | 2.576447  | -0.932157 |
| H | -2.996902 | -8.620033 | 2.630106  | H | 6.965275   | 1.233375  | -0.036169 |
| N | -0.098136 | -3.600012 | -0.085488 | C | 9.439009   | 4.256826  | 1.133781  |
| C | 2.621230  | -0.729069 | -2.531791 | H | 11.018511  | 5.387767  | 0.371774  |
| C | 4.828886  | -3.783208 | -4.782517 | H | 8.047004   | 5.568592  | 1.956710  |
| C | 5.706621  | -1.472964 | -5.468434 | H | 10.199262  | 3.061946  | 2.662190  |
| H | 5.353485  | -5.673649 | -5.386539 | C | 10.461833  | 1.039158  | -2.136551 |
| H | 7.167604  | -0.934186 | -6.805035 | H | 9.776538   | -0.393589 | -3.477488 |
| C | -2.712365 | -0.697037 | 2.438115  | H | 11.756963  | 2.322254  | -3.149723 |
| C | -4.993901 | -3.728034 | 4.645626  | H | 11.545726  | 0.060485  | -0.648384 |

|   |           |           |           |   |           |          |            |
|---|-----------|-----------|-----------|---|-----------|----------|------------|
| C | -5.789867 | -1.406830 | 5.391420  | C | 1.783519  | 3.080714 | -8.119485  |
| H | -5.571818 | -5.613497 | 5.215429  | H | 0.741469  | 1.646239 | -7.009010  |
| H | -7.218707 | -0.851158 | 6.755389  | C | 3.080909  | 1.736293 | -10.357558 |
| N | -3.129868 | -3.265433 | 2.850111  | H | 1.643977  | 0.906915 | -11.618852 |
| N | -4.403196 | 0.409087  | 4.039585  | H | 4.195651  | 3.114356 | -11.456969 |
| N | 2.959047  | -3.299821 | -2.998266 | H | 4.354722  | 0.212057 | -9.743244  |
| N | 4.363411  | 0.356649  | -4.091690 | C | -0.128138 | 4.978120 | -9.187640  |
| C | -4.898655 | 3.075422  | 4.421718  | H | -1.673003 | 3.953611 | -10.140195 |
| C | -6.814623 | 4.228622  | 2.964569  | H | -0.953102 | 6.186487 | -7.704605  |
| C | -3.642468 | 4.317324  | 6.419257  | H | 0.774869  | 6.220512 | -10.599750 |

---

### S3 Density of States in the Wigner Ensemble

We show the singlet and triplet density of states (DOS) of the  $[\text{Fe}^{\text{II}}(\text{tpy})(\text{pyz}-\text{NHC})]^{2+}$  obtained at the LC-BLYP/6-31G\* level of theory for a Wigner ensemble of 200 geometries in Figure S5. As can be seen, the 20 singlet and 20 triplet states cover the energy range up to 3.5 eV. Thus, it is sufficient to include this number of states in the excited-state dynamics simulations.

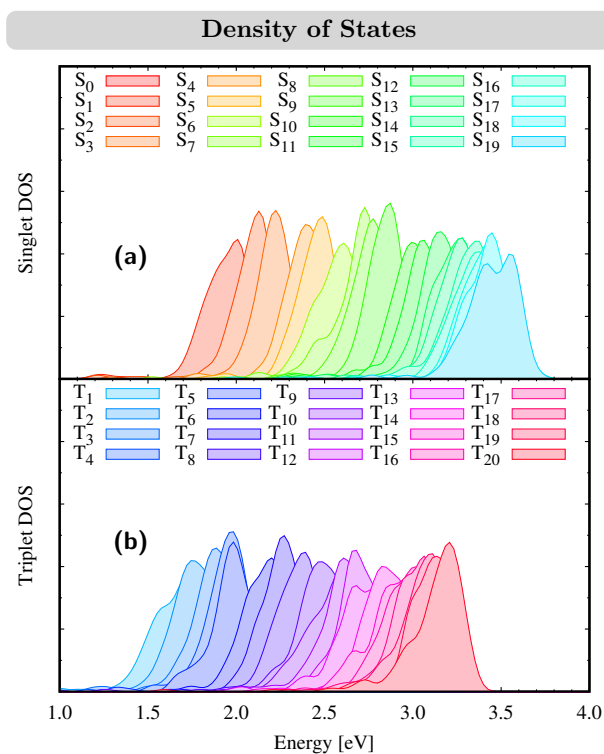

Figure S5: Singlet (a) and triplet (b) density of states of the  $[\text{Fe}^{\text{II}}(\text{tpy})(\text{pyz}-\text{NHC})]^{2+}$  obtained at the LC-BLYP/6-31G\* level of theory for a Wigner ensemble of 200 geometries.

## S4 Excited States at the FC Geometry

The energies, oscillator strengths, as well as state characters of the excited states were computed at the LC-BLYP/6-31G\* level of theory at the FC geometry are shown in Table S4



Table S4: Energy in eV, oscillator strength  $f_{osc}$ , and excitation character of excited states computed at the FC geometry.

| State    | Energy | $f_{osc}$ | MC     | ML1CT  | ML2CT  | L1MCT  | L1loc  | L1L2CT | L2MCT  | L2L1loc | L2loc  |
|----------|--------|-----------|--------|--------|--------|--------|--------|--------|--------|---------|--------|
| $S_1$    | 1.9988 | 0.002559  | 0.0960 | 0.0260 | 0.5637 | 0.0164 | 0.0045 | 0.0945 | 0.0263 | 0.0066  | 0.1657 |
| $S_2$    | 2.1990 | 0.007825  | 0.0657 | 0.5955 | 0.0356 | 0.0129 | 0.1216 | 0.0070 | 0.0149 | 0.1379  | 0.0085 |
| $S_3$    | 2.2091 | 0.000006  | 0.1029 | 0.0528 | 0.5806 | 0.0250 | 0.0082 | 0.1485 | 0.0116 | 0.0089  | 0.0611 |
| $S_4$    | 2.4478 | 0.000008  | 0.0358 | 0.6573 | 0.0195 | 0.0081 | 0.1353 | 0.0045 | 0.0063 | 0.1296  | 0.0032 |
| $S_5$    | 2.4970 | 0.000000  | 0.0838 | 0.6259 | 0.0565 | 0.0082 | 0.0461 | 0.0081 | 0.0179 | 0.1425  | 0.0106 |
| $S_6$    | 2.6152 | 0.034548  | 0.0243 | 0.6637 | 0.0102 | 0.0086 | 0.2065 | 0.0035 | 0.0029 | 0.0779  | 0.0019 |
| $S_7$    | 2.8017 | 0.097488  | 0.0700 | 0.2985 | 0.3493 | 0.0098 | 0.0780 | 0.0301 | 0.0162 | 0.0505  | 0.0973 |
| $S_8$    | 2.7009 | 0.000072  | 0.0385 | 0.7205 | 0.0092 | 0.0042 | 0.0521 | 0.0008 | 0.0075 | 0.1646  | 0.0022 |
| $S_9$    | 2.8851 | 0.024686  | 0.0376 | 0.2593 | 0.3985 | 0.0095 | 0.0696 | 0.0635 | 0.0082 | 0.0471  | 0.1062 |
| $S_{10}$ | 3.0786 | 0.000370  | 0.0583 | 0.0275 | 0.6483 | 0.0119 | 0.0068 | 0.1662 | 0.0079 | 0.0036  | 0.0691 |
| $S_{11}$ | 3.2355 | 0.000016  | 0.4528 | 0.1745 | 0.0856 | 0.0794 | 0.0306 | 0.0151 | 0.1026 | 0.0405  | 0.0186 |
| $S_{12}$ | 3.2128 | 0.010524  | 0.0691 | 0.0411 | 0.6193 | 0.0107 | 0.0054 | 0.0450 | 0.0170 | 0.0086  | 0.1834 |
| $S_{13}$ | 3.3742 | 0.000056  | 0.5069 | 0.2118 | 0.0553 | 0.0331 | 0.0145 | 0.0059 | 0.1127 | 0.0477  | 0.0116 |
| $S_{14}$ | 3.3798 | 0.032989  | 0.0053 | 0.6129 | 0.0217 | 0.0071 | 0.1760 | 0.0074 | 0.0020 | 0.1612  | 0.0061 |
| $S_{15}$ | 3.4214 | 0.060784  | 0.0160 | 0.4122 | 0.2639 | 0.0024 | 0.0883 | 0.0410 | 0.0063 | 0.1043  | 0.0651 |
| $S_{16}$ | 3.5194 | 0.014730  | 0.0049 | 0.6833 | 0.0211 | 0.0019 | 0.1997 | 0.0053 | 0.0009 | 0.0784  | 0.0040 |
| $S_{17}$ | 3.5521 | 0.008395  | 0.0422 | 0.6149 | 0.0578 | 0.0111 | 0.1736 | 0.0146 | 0.0055 | 0.0701  | 0.0097 |
| $S_{18}$ | 3.6251 | 0.000685  | 0.3281 | 0.2360 | 0.1295 | 0.0894 | 0.0466 | 0.0267 | 0.0429 | 0.0410  | 0.0593 |
| $S_{19}$ | 3.6082 | 0.000027  | 0.0053 | 0.7468 | 0.0139 | 0.0004 | 0.0538 | 0.0010 | 0.0012 | 0.1739  | 0.0033 |
| $T_1$    | 1.6832 | 0.000000  | 0.0930 | 0.0258 | 0.5638 | 0.0147 | 0.0041 | 0.0896 | 0.0272 | 0.0068  | 0.1746 |
| $T_2$    | 1.8402 | 0.000000  | 0.0982 | 0.1493 | 0.5016 | 0.0100 | 0.0390 | 0.0353 | 0.0217 | 0.0192  | 0.1253 |
| $T_3$    | 2.0243 | 0.000000  | 0.0733 | 0.4992 | 0.1348 | 0.0172 | 0.1482 | 0.0149 | 0.0117 | 0.0683  | 0.0320 |
| $T_4$    | 1.9755 | 0.000000  | 0.0672 | 0.5748 | 0.0577 | 0.0149 | 0.1405 | 0.0091 | 0.0128 | 0.1098  | 0.0129 |
| $T_5$    | 1.9117 | 0.000000  | 0.1009 | 0.0657 | 0.5769 | 0.0237 | 0.0085 | 0.1422 | 0.0109 | 0.0117  | 0.0591 |
| $T_6$    | 2.1643 | 0.000000  | 0.0466 | 0.5853 | 0.0321 | 0.0107 | 0.1807 | 0.0052 | 0.0095 | 0.1209  | 0.0086 |
| $T_7$    | 2.3317 | 0.000000  | 0.0815 | 0.6114 | 0.0738 | 0.0078 | 0.0444 | 0.0133 | 0.0172 | 0.1376  | 0.0125 |
| $T_8$    | 2.3245 | 0.000000  | 0.0289 | 0.6344 | 0.0090 | 0.0098 | 0.2322 | 0.0034 | 0.0034 | 0.0773  | 0.0012 |
| $T_9$    | 2.5635 | 0.000000  | 0.4869 | 0.2183 | 0.0377 | 0.0777 | 0.0344 | 0.0061 | 0.0900 | 0.0413  | 0.0072 |
| $T_{10}$ | 2.7368 | 0.000000  | 0.4849 | 0.2359 | 0.0387 | 0.1048 | 0.0470 | 0.0079 | 0.0472 | 0.0274  | 0.0058 |
| $T_{11}$ | 2.7649 | 0.000000  | 0.5120 | 0.2313 | 0.0376 | 0.0382 | 0.0176 | 0.0032 | 0.1040 | 0.0477  | 0.0080 |
| $T_{12}$ | 2.6378 | 0.000000  | 0.0318 | 0.0793 | 0.5184 | 0.0046 | 0.0268 | 0.0812 | 0.0111 | 0.0188  | 0.2276 |
| $T_{13}$ | 2.5457 | 0.000000  | 0.0831 | 0.6619 | 0.0221 | 0.0083 | 0.0489 | 0.0018 | 0.0162 | 0.1500  | 0.0074 |
| $T_{14}$ | 2.9534 | 0.000000  | 0.0312 | 0.0451 | 0.6239 | 0.0027 | 0.0034 | 0.0440 | 0.0155 | 0.0121  | 0.2216 |
| $T_{15}$ | 3.0978 | 0.000000  | 0.4606 | 0.0563 | 0.2221 | 0.0733 | 0.0092 | 0.0355 | 0.0876 | 0.0111  | 0.0439 |
| $T_{16}$ | 2.9337 | 0.000000  | 0.0607 | 0.1090 | 0.5510 | 0.0152 | 0.0401 | 0.1416 | 0.0066 | 0.0152  | 0.0602 |
| $T_{17}$ | 3.1956 | 0.000000  | 0.4583 | 0.0638 | 0.2323 | 0.1041 | 0.0159 | 0.0529 | 0.0427 | 0.0069  | 0.0229 |
| $T_{18}$ | 3.1490 | 0.000000  | 0.0095 | 0.5774 | 0.0554 | 0.0032 | 0.1774 | 0.0100 | 0.0020 | 0.1207  | 0.0440 |
| $T_{19}$ | 3.1812 | 0.000000  | 0.0052 | 0.5818 | 0.0649 | 0.0044 | 0.1855 | 0.0183 | 0.0013 | 0.1290  | 0.0092 |
| $T_{20}$ | 3.3037 | 0.000000  | 0.0040 | 0.1478 | 0.0050 | 0.0134 | 0.7277 | 0.0108 | 0.0020 | 0.0837  | 0.0051 |

## S5 Normal Modes in LVC Model

Table S5 provides a list of all normal modes and denotes when the modes were excluded in the analysis shown in Figure 5 in the main paper.

Table S5: Normal modes excluded in the LVC model.

| No. | $\omega$ [cm <sup>-1</sup> ] | Excluded | No. | $\omega$ [cm <sup>-1</sup> ] | Excluded | No. | $\omega$ [cm <sup>-1</sup> ] | Excluded |
|-----|------------------------------|----------|-----|------------------------------|----------|-----|------------------------------|----------|
| 7   | -15.47                       | always   | 115 | 731.18                       |          | 223 | 1344.04                      |          |
| 8   | -14.47                       | always   | 116 | 734.21                       |          | 224 | 1356.95                      |          |
| 9   | 18.21                        | Modes70  | 117 | 738.13                       |          | 225 | 1357.28                      |          |
| 10  | 27.33                        | Modes50  | 118 | 750.22                       |          | 226 | 1364.43                      |          |
| 11  | 29.03                        | Modes40  | 119 | 754.02                       |          | 227 | 1366.94                      |          |
| 12  | 30.95                        | Modes30  | 120 | 754.58                       |          | 228 | 1368.59                      |          |
| 13  | 37.10                        | Modes50  | 121 | 761.12                       |          | 229 | 1368.63                      |          |
| 14  | 40.68                        | Modes30  | 122 | 795.55                       |          | 230 | 1371.31                      |          |
| 15  | 46.60                        | Modes20  | 123 | 795.83                       |          | 231 | 1386.36                      |          |
| 16  | 49.83                        | Modes40  | 124 | 796.14                       |          | 232 | 1386.46                      |          |
| 17  | 57.60                        | Modes40  | 125 | 797.96                       |          | 233 | 1387.24                      |          |
| 18  | 58.43                        | Modes30  | 126 | 811.19                       |          | 234 | 1387.58                      |          |
| 19  | 75.19                        | Modes20  | 127 | 811.29                       |          | 235 | 1389.26                      |          |
| 20  | 76.32                        | Modes10  | 128 | 815.83                       |          | 236 | 1395.06                      |          |
| 21  | 82.58                        | Modes30  | 129 | 816.88                       |          | 237 | 1410.49                      |          |
| 22  | 92.92                        | Modes20  | 130 | 832.91                       |          | 238 | 1415.49                      |          |
| 23  | 93.10                        | Modes30  | 131 | 837.38                       |          | 239 | 1437.92                      |          |
| 24  | 106.42                       | Modes60  | 132 | 871.88                       |          | 240 | 1448.31                      |          |
| 25  | 120.78                       | Modes90  | 133 | 873.02                       |          | 241 | 1448.46                      |          |
| 26  | 124.90                       | Modes100 | 134 | 873.06                       |          | 242 | 1448.76                      |          |
| 27  | 126.00                       | Modes100 | 135 | 887.46                       |          | 243 | 1448.98                      |          |

|    |        |          |     |         |          |     |         |
|----|--------|----------|-----|---------|----------|-----|---------|
| 28 | 134.16 | Modes100 | 136 | 888.77  |          | 244 | 1450.44 |
| 29 | 138.01 | Modes90  | 137 | 888.83  |          | 245 | 1450.63 |
| 30 | 146.51 |          | 138 | 892.79  |          | 246 | 1454.49 |
| 31 | 155.62 | Modes100 | 139 | 892.84  |          | 247 | 1454.69 |
| 32 | 157.95 | Modes80  | 140 | 910.39  |          | 248 | 1454.97 |
| 33 | 165.29 | Modes40  | 141 | 910.48  |          | 249 | 1455.53 |
| 34 | 168.09 | Modes20  | 142 | 911.31  |          | 250 | 1464.40 |
| 35 | 178.24 | Modes30  | 143 | 911.44  |          | 251 | 1464.54 |
| 36 | 185.34 | Modes20  | 144 | 929.49  | Modes60  | 252 | 1465.67 |
| 37 | 202.47 | Modes30  | 145 | 935.02  | Modes90  | 253 | 1466.19 |
| 38 | 211.62 | Modes60  | 146 | 935.50  | Modes80  | 254 | 1468.89 |
| 39 | 214.41 | Modes60  | 147 | 937.18  | Modes80  | 255 | 1469.25 |
| 40 | 217.07 | Modes70  | 148 | 937.61  | Modes70  | 256 | 1475.10 |
| 41 | 223.08 | Modes70  | 149 | 942.69  | Modes60  | 257 | 1475.12 |
| 42 | 232.13 | Modes60  | 150 | 948.79  |          | 258 | 1475.90 |
| 43 | 237.12 | Modes60  | 151 | 952.28  |          | 259 | 1476.17 |
| 44 | 237.51 | Modes70  | 152 | 952.62  |          | 260 | 1476.72 |
| 45 | 252.87 | Modes90  | 153 | 952.94  | Modes100 | 261 | 1479.84 |
| 46 | 254.80 | Modes60  | 154 | 953.64  | Modes100 | 262 | 1479.95 |
| 47 | 261.28 | Modes50  | 155 | 960.15  |          | 263 | 1501.30 |
| 48 | 266.14 | Modes50  | 156 | 960.62  |          | 264 | 1501.35 |
| 49 | 282.20 | Modes30  | 157 | 962.56  | Modes100 | 265 | 1503.15 |
| 50 | 285.07 | Modes50  | 158 | 976.47  |          | 266 | 1548.24 |
| 51 | 286.49 | Modes80  | 159 | 977.05  | Modes100 | 267 | 1565.28 |
| 52 | 291.21 | Modes90  | 160 | 997.35  | Modes70  | 268 | 1576.47 |
| 53 | 297.70 | Modes10  | 161 | 1015.81 | Modes40  | 269 | 1578.79 |
| 54 | 299.79 | Modes50  | 162 | 1018.57 | Modes80  | 270 | 1580.49 |

|    |        |         |     |         |         |     |         |          |
|----|--------|---------|-----|---------|---------|-----|---------|----------|
| 55 | 303.51 | Modes40 | 163 | 1033.46 | Modes80 | 271 | 1586.31 |          |
| 56 | 305.85 | Modes10 | 164 | 1037.08 |         | 272 | 1607.80 |          |
| 57 | 307.28 | Modes50 | 165 | 1044.74 |         | 273 | 1608.10 |          |
| 58 | 308.85 | Modes50 | 166 | 1045.16 |         | 274 | 1612.08 |          |
| 59 | 310.70 | Modes80 | 167 | 1050.87 |         | 275 | 1612.17 |          |
| 60 | 316.29 |         | 168 | 1055.40 |         | 276 | 1614.33 | Modes60  |
| 61 | 320.18 | Modes50 | 169 | 1055.86 |         | 277 | 1625.02 |          |
| 62 | 331.16 | Modes10 | 170 | 1056.95 |         | 278 | 1625.12 | Modes100 |
| 63 | 333.84 | Modes10 | 171 | 1064.48 |         | 279 | 1631.24 |          |
| 64 | 343.33 | Modes30 | 172 | 1064.87 |         | 280 | 2965.98 |          |
| 65 | 345.00 | Modes30 | 173 | 1066.81 |         | 281 | 2966.16 |          |
| 66 | 354.72 | Modes20 | 174 | 1077.30 |         | 282 | 2966.60 |          |
| 67 | 372.08 | Modes10 | 175 | 1083.75 |         | 283 | 2967.76 |          |
| 68 | 375.81 | Modes20 | 176 | 1088.03 |         | 284 | 2980.82 |          |
| 69 | 395.70 | Modes10 | 177 | 1089.97 |         | 285 | 2981.09 |          |
| 70 | 404.59 | Modes20 | 178 | 1098.52 |         | 286 | 2982.03 |          |
| 71 | 422.06 | Modes20 | 179 | 1098.93 |         | 287 | 2982.12 |          |
| 72 | 433.33 | Modes10 | 180 | 1106.21 |         | 288 | 2987.65 |          |
| 73 | 434.35 | Modes20 | 181 | 1106.40 |         | 289 | 2988.21 |          |
| 74 | 435.03 | Modes10 | 182 | 1107.39 |         | 290 | 2988.57 |          |
| 75 | 444.17 | Modes10 | 183 | 1112.61 |         | 291 | 2988.65 |          |
| 76 | 455.37 | Modes40 | 184 | 1125.20 |         | 292 | 3046.46 |          |
| 77 | 458.19 | Modes40 | 185 | 1125.96 |         | 293 | 3046.67 |          |
| 78 | 460.43 | Modes50 | 186 | 1129.43 |         | 294 | 3046.87 |          |
| 79 | 463.18 | Modes70 | 187 | 1139.08 |         | 295 | 3046.92 |          |
| 80 | 465.67 |         | 188 | 1140.09 |         | 296 | 3051.84 |          |
| 81 | 479.73 | Modes40 | 189 | 1148.61 |         | 297 | 3052.49 |          |

|     |        |          |     |         |     |         |
|-----|--------|----------|-----|---------|-----|---------|
| 82  | 506.80 |          | 190 | 1148.81 | 298 | 3053.66 |
| 83  | 516.55 |          | 191 | 1154.77 | 299 | 3053.93 |
| 84  | 516.60 | Modes40  | 192 | 1159.48 | 300 | 3059.77 |
| 85  | 517.48 | Modes100 | 193 | 1159.50 | 301 | 3060.58 |
| 86  | 518.92 |          | 194 | 1169.31 | 302 | 3065.21 |
| 87  | 527.19 | Modes70  | 195 | 1175.53 | 303 | 3065.38 |
| 88  | 553.47 | Modes90  | 196 | 1175.64 | 304 | 3081.02 |
| 89  | 553.71 | Modes90  | 197 | 1176.93 | 305 | 3081.68 |
| 90  | 564.83 |          | 198 | 1218.42 | 306 | 3084.78 |
| 91  | 566.99 |          | 199 | 1221.00 | 307 | 3085.49 |
| 92  | 579.38 |          | 200 | 1253.64 | 308 | 3129.15 |
| 93  | 582.87 |          | 201 | 1253.77 | 309 | 3129.30 |
| 94  | 598.10 |          | 202 | 1255.71 | 310 | 3145.46 |
| 95  | 609.54 |          | 203 | 1256.10 | 311 | 3147.33 |
| 96  | 622.56 |          | 204 | 1268.34 | 312 | 3148.30 |
| 97  | 624.00 |          | 205 | 1275.49 | 313 | 3148.34 |
| 98  | 627.00 |          | 206 | 1277.07 | 314 | 3148.38 |
| 99  | 627.08 |          | 207 | 1287.14 | 315 | 3149.25 |
| 100 | 633.52 | Modes60  | 208 | 1291.49 | 316 | 3153.00 |
| 101 | 638.01 | Modes80  | 209 | 1291.79 | 317 | 3154.42 |
| 102 | 638.51 | Modes90  | 210 | 1292.44 | 318 | 3154.48 |
| 103 | 639.05 | Modes80  | 211 | 1293.09 | 319 | 3155.91 |
| 104 | 647.03 | Modes80  | 212 | 1295.25 | 320 | 3157.52 |
| 105 | 663.80 | Modes70  | 213 | 1298.66 | 321 | 3157.94 |
| 106 | 670.44 |          | 214 | 1303.85 | 322 | 3164.86 |
| 107 | 673.15 |          | 215 | 1307.89 | 323 | 3164.88 |
| 108 | 679.24 |          | 216 | 1308.46 | 324 | 3170.10 |

|     |        |         |     |         |         |     |         |
|-----|--------|---------|-----|---------|---------|-----|---------|
| 109 | 695.16 |         | 217 | 1308.84 |         | 325 | 3176.99 |
| 110 | 710.28 | Modes90 | 218 | 1310.94 | Modes90 | 326 | 3177.94 |
| 111 | 718.62 | Modes70 | 219 | 1314.75 |         | 327 | 3231.69 |
| 112 | 724.07 |         | 220 | 1321.31 |         | 328 | 3232.53 |
| 113 | 727.83 |         | 221 | 1323.45 |         | 329 | 3249.36 |
| 114 | 729.73 |         | 222 | 1342.71 |         | 330 | 3250.20 |

---

## S6 Charge Flow During the Dynamics

In addition to this file, three videos in gif format are provided, that depict the charge flow in terms of atomic hole/electron populations of trajectories in singlet states, trajectories in triplet states with small dipole moments, and trajectories in triplet states with large dipole moments, respectively. The corresponding files are named:

- charge\_flow\_singlet.gif
- charge\_flow\_triplets\_small\_dipole\_moment.gif
- charge\_flow\_triplets\_large\_dipole\_moment.gif
